# Supplementary material
Source: Research Square preprint supplement (doi:10.21203/rs.3.rs-9963431/v1)
Supplement: Supplementary file 1 [file 36fb3e4365ada0fc43875ad7.docx]

**Synergy of Surface Oxygen Vacancies and Built-in Electric Field in 0D/2D CeO₂/SnSe₂ S-scheme Heterojunctions for Enhanced Photocatalytic Malachite Green Degradation**

**Yan Luo1, Fangfang Cheng1, Lin Han1,2, Zhiwang Sun1, Yingxu Wang1, Hong Zhong3,*, Shifeng Wang1,***

1 Key Laboratory of Plateau Oxygen and Living Environment of Xizang Autonomous Region, College of Science, Xizang University, Lhasa 850000, China;

2 School of Ecology, Xizang University, Lhasa 850000, China

3 The Department of Building Environment and Energy Engineering, The Hong Kong Polytechnic University, Hong Kong 999077, China

* Correspondence: wsf@utibet.edu.cn (S.W.); [auston.zhong@connect.polyu.hk](mailto:auston.zhong@connect.polyu.hk) (H. Z,)


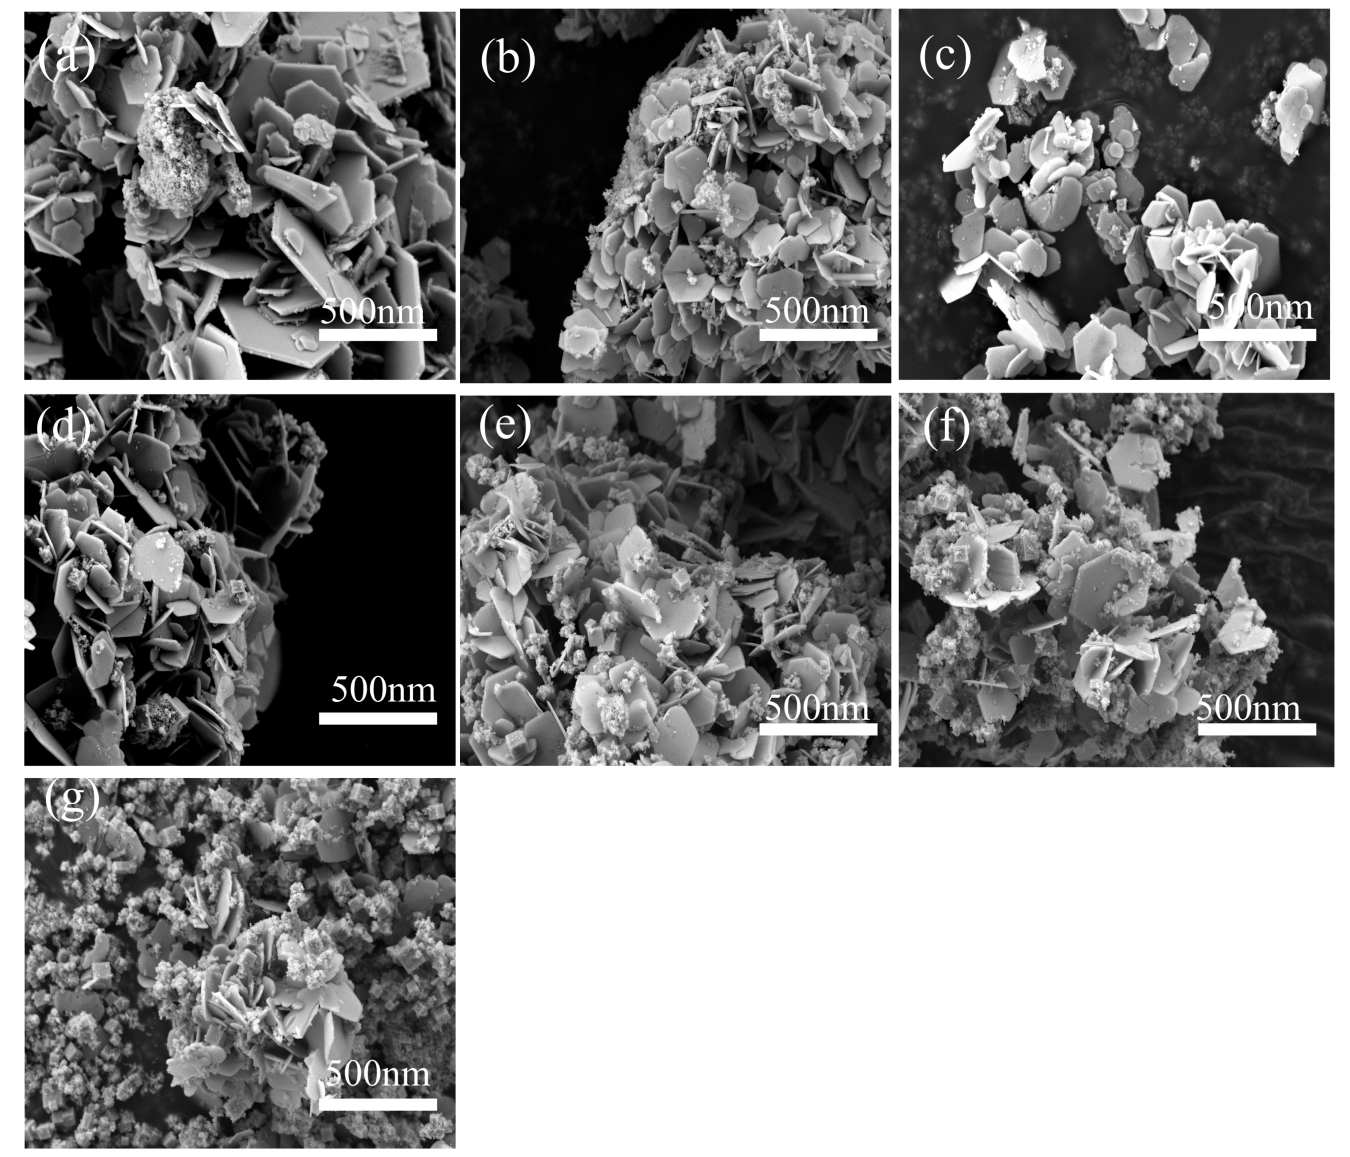


Figure S1. Composites with different CeO2/SnSe2 ratios: (a) 0.02 g CeO2/SnSe2, (b) 0.05 g CeO2/SnSe2, (c)0.1 g CeO2/SnSe2, (d) 0.2 g CeO2/SnSe2, (e) 0.5 g CeO2/SnSe2, (f) 1 g CeO2/SnSe2, (g) 2 g CeO2/SnSe2.

(a)

Figure S2. Adsorption capacities of the respective photocatalysts under dark-state equilibration

(a)


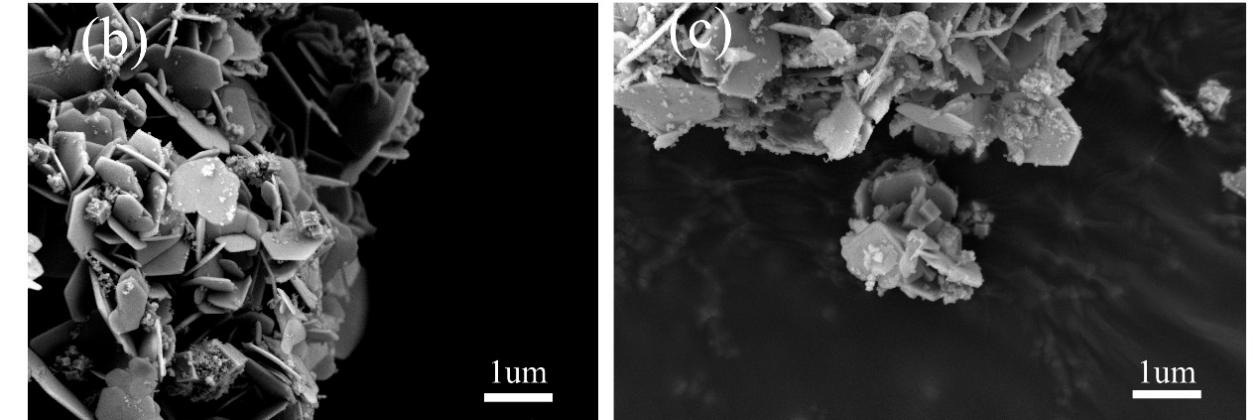


Figure S3. (a) XRD of 0.2 g CeO2/SnSe2 before and after photocatalysis. (b) SEM of 0.2 g CeO2/SnSe2 before photocatalysis. (c)0.2 g CeO2/SnSe2 after photocatalysis.
